# Supplementary material for: Rational design and fabrication of graphene/carbon nanotubes hybrid sponge for high-performance capacitive deionization
Source: Royal Society of Chemistry journal article supplement (doi:10.1039/c5ta01889g), 2015-01-01
Supplement: c5ta01889g1.pdf [file c5ta01889g1.pdf]

**Rational design and fabrication of graphene/carbon nanotubes hybrid sponge for  
high performance capacitive deionization**

Xingtao Xu<sup>a</sup>, Yong Liu<sup>a</sup>, Ting Lu<sup>a</sup>, Zhuo Sun<sup>a</sup>, Daniel H. C. Chua<sup>b</sup> and Likun Pan<sup>a\*</sup>

*<sup>a</sup>Engineering Research Center for Nanophotonics & Advanced Instrument, Ministry  
of Education, Shanghai Key Laboratory of Magnetic Resonance, Department of  
Physics, East China Normal University, Shanghai 200062, China*

*<sup>b</sup>Department of Materials Science and Engineering, National University of Singapore  
117574, Singapore*

---

\* Corresponding author. Tel: 86 21 62234132; Fax: 86 21 62234321; E-mail: lkpan@phy.ecnu.edu.cn

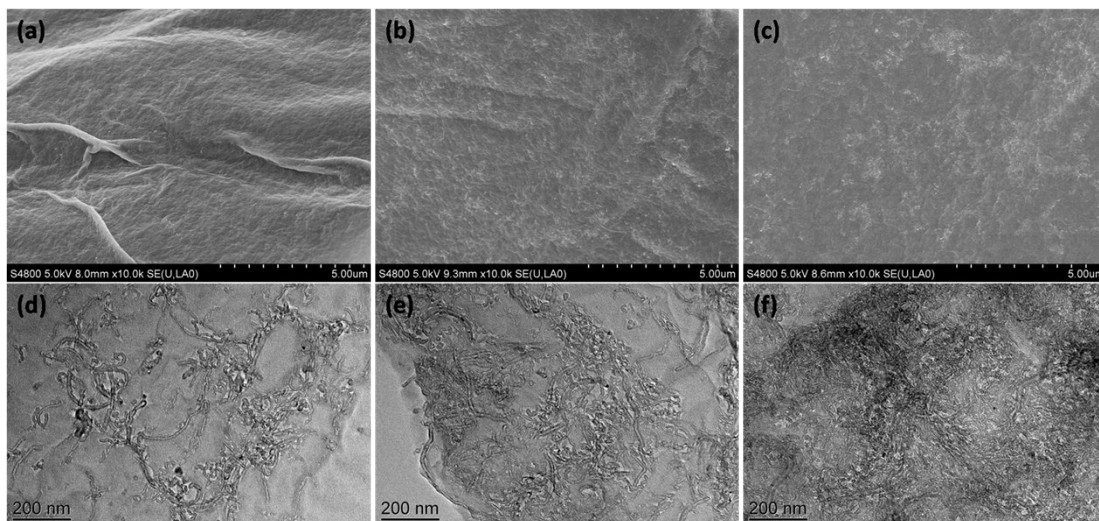

Fig. S1 SEM and TEM images of GNS-1 (a, d), GNS-3 (b, e) and GNS-4 (c, f).

\*
